# Supplementary material
Source: publisher site journal article supplement (https://www.dovepress.com/article/499911)
Supplement: Supplementary file 1 [file get_supplementary_file.php]

| **VISUAL TASK DIFFICULTY ASSESSMENT** | **Glare / Flare (trouble seeing street signs due to bright light or oncoming headlight)?** | | | **Night vision** | | | **Color perception (trouble recognizing specific colors)** | | | **Halos (rings around lights)** | | | **Depth perception (trouble lining things up; pouring liquids; going downstairs)** | | |
| --- | --- | --- | --- | --- | --- | --- | --- | --- | --- | --- | --- | --- | --- | --- | --- |
| **How much difficulty have you got with each of the following?** | **PRE-OP** | **1 MONTH POST-OP** | **3 MONTH POST-OP** | **PRE-OP** | **1 MONTH POST-OP** | **3 MONTH POST-OP** | **PRE-OP** | **1 MONTH POST-OP** | **3 MONTH POST-OP** | **PRE-OP** | **1 MONTH POST-OP** | **3 MONTH POST-OP** | **PRE-OP** | **1 MONTH POST-OP** | **3 MONTH POST-OP** |
| **No difficulty** | 20 | 30 | 50 | 30 | 10 | 30 | 80 | 80 | 100 | 60 | 20 | 30 | 20 | 20 | 70 |
| **Minor difficulty** | 20 | 40 | 40 | 10 | 50 | 60 | 10 | 20 | 0 | 30 | 40 | 70 | 30 | 70 | 30 |
| **Moderate Difficulty** | 50 | 20 | 0 | 20 | 20 | 10 | 10 | 0 | 0 | 0 | 30 | 0 | 50 | 10 | 0 |
| **Major Difficulty** | 0 | 10 | 0 | 30 | 20 | 0 | 0 | 0 | 0 | 0 | 10 | 0 | 0 | 0 | 0 |
| **Cannot accomplish** | 0 | 0 | 0 | 10 | 0 | 0 | 0 | 0 | 0 | 10 | 0 | 0 | 0 | 0 | 0 |
| **Not applicable** | 10 | 0 | 10 | 0 | 0 | 0 | 0 | 0 | 0 | 0 | 0 | 0 | 0 | 0 | 0 |

| **Distorted near vision (straight lines looked crooked close up)** | | | **Distorted distance vision (straight lines looked crooked close up)** | | | **Distorted distance vision (straight lines looked crooked at distance)** | | | **Blurred near vision** | | | **Double vision** | | |
| --- | --- | --- | --- | --- | --- | --- | --- | --- | --- | --- | --- | --- | --- | --- |
| **PRE-OP** | **1 MONTH POST-OP** | **3 MONTH POST-OP** | **PRE-OP** | **1 MONTH POST-OP** | **3 MONTH POST-OP** | **PRE-OP** | **1 MONTH POST-OP** | **3 MONTH POST-OP** | **PRE-OP** | **1 MONTH POST-OP** | **3 MONTH POST-OP** | **PRE-OP** | **1 MONTH POST-OP** | **3**  **MONTH POST-OP** |
| 60 | 60 | 60 | 70 | 50 | 80 | 20 | 20 | 40 | 0 | 20 | 70 | 100 | 100 | 100 |
| 20 | 30 | 30 | 0 | 30 | 20 | 30 | 30 | 40 | 0 | 30 | 20 | 0 | 0 | 0 |
| 20 | 0 | 10 | 10 | 10 | 0 | 20 | 20 | 20 | 60 | 10 | 10 | 0 | 0 | 0 |
| 0 | 10 | 0 | 20 | 10 | 0 | 30 | 30 | 0 | 40 | 40 | 0 | 0 | 0 | 0 |
| 0 | 0 | 0 | 0 | 0 | 0 | 0 | 0 | 0 | 0 | 0 | 0 | 0 | 0 | 0 |
| 0 | 0 | 0 | 0 | 0 | 0 | 0 | 0 | 0 | 0 | 0 | 0 | 0 | 0 | 0 |

Supplemental Table 1.1 Visual Task Difficulty Assessment section of Visual Function Questionnaire (VFQ) test. Results are expressed in %.

| **VISUAL LIFESTYLE ACTIVIES** | **Watching TV or movies** | | | **Playing or working outdoors** | | | **Caring for / playing with children** | | | **Reading the time on an alarm clock** | | | | **Seeing clearly when waking up** | | | **Reading the time on a wall clock** | | **Performing your jobs / hobbies** | | | **Participating in sports / recreation** | | |
| --- | --- | --- | --- | --- | --- | --- | --- | --- | --- | --- | --- | --- | --- | --- | --- | --- | --- | --- | --- | --- | --- | --- | --- | --- |
| **How much difficulties have you got with each of the following activities due to your vision (without glasses or contact lenses)?** | **PRE-OP** | **1 MONTH POST-OP** | **3 MONTH POST-OP** | **PRE-OP** | **1 MONTH POST-OP** | **3 MONTH POST-OP** | **PRE-OP** | **1 MONTH POST-OP** | **3 MONTH POST-OP** | **PRE-OP** | **1 MONTH POST-OP** | **3 MONTH POST-OP** | **PRE-OP** | **1 MONTH POST-OP** | **3 MONTH POST-OP** | **PRE-OP** | **1 MONTH POST-OP** | **3 MONTH POST-OP** | **PRE-OP** | **1 MONTH POST-OP** | **3 MONTH POST-OP** | **PRE-OP** | **1 MONTH POST-OP** | **3 MONTH POST-OP** |
| **No difficulty** | 20 | 30 | 60 | 50 | 50 | 60 | 50 | 30 | 40 | 40 | 70 | 70 | 30 | 30 | 50 | 30 | 50 | 60 | 50 | 50 | 50 | 50 | 20 | 20 |
| **Minor difficulty** | 50 | 60 | 40 | 20 | 10 | 0 | 0 | 0 | 10 | 20 | 30 | 30 | 40 | 30 | 50 | 50 | 40 | 30 | 20 | 0 | 10 | 0 | 0 | 0 |
| **Moderate Difficulty** | 30 | 10 | 0 | 0 | 0 | 0 | 0 | 10 | 0 | 30 | 0 | 0 | 30 | 40 | 0 | 10 | 10 | 10 | 10 | 10 | 0 | 0 | 0 | 0 |
| **Major Difficulty** | 0 | 0 | 0 | 0 | 0 | 0 | 0 | 0 | 0 | 0 | 0 | 0 | 0 | 0 | 0 | 0 | 0 | 0 | 10 | 0 | 0 | 0 | 0 | 0 |
| **Cannot accomplish** | 0 | 0 | 0 | 0 | 0 | 0 | 0 | 0 | 0 | 10 | 0 | 0 | 0 | 0 | 0 | 10 | 0 | 0 | 0 | 0 | 0 | 0 | 0 | 0 |
| **Not applicable** | 0 | 0 | 0 | 30 | 40 | 40 | 50 | 60 | 50 | 0 | 0 | 0 | 0 | 0 | 0 | 0 | 0 | 0 | 10 | 40 | 40 | 50 | 80 | 80 |

| **Participating in social events** | | | **Reading and near work activities** | | | **Driving at night** | | | **Driving when it is raining** | | | **Using a computer** | | | **Cooking** | | | **Shopping** | | | **Using a cell phone** | | | **Shaving or putting on make-up** | | |
| --- | --- | --- | --- | --- | --- | --- | --- | --- | --- | --- | --- | --- | --- | --- | --- | --- | --- | --- | --- | --- | --- | --- | --- | --- | --- | --- |
| **PRE-OP** | **1 MONTH POST-OP** | **3 MONTH POST-OP** | **PRE-OP** | **1 MONTH POST-OP** | **3 MONTH POST-OP** | **PRE-OP** | **1 MONTH POST-OP** | **3 MONTH POST-OP** | **PRE-OP** | **1 MONTH POST-OP** | **3 MONTH POST-OP** | **PRE-OP** | **1 MONTH POST-OP** | **3 MONTH POST-OP** | **PRE-OP** | **1 MONTH POST-OP** | **3 MONTH POST-OP** | **PRE-OP** | **1 MONTH POST-OP** | **3 MONTH POST-OP** | **PRE-OP** | **1 MONTH POST-OP** | **3 MONTH POST-OP** | **PRE-OP** | **1 MONTH POST-OP** | **3 MONTH POST-OP** |
| 80 | 80 | 90 | 20 | 30 | 30 | 0 | 0 | 0 | 0 | 0 | 0 | 10 | 10 | 20 | 70 | 80 | 90 | 50 | 40 | 70 | 50 | 70 | 80 | 30 | 20 | 20 |
| 10 | 20 | 10 | 10 | 40 | 60 | 0 | 0 | 0 | 0 | 0 | 0 | 0 | 10 | 0 | 20 | 20 | 10 | 20 | 30 | 30 | 30 | 20 | 20 | 0 | 0 | 10 |
| 0 | 0 | 0 | 50 | 20 | 10 | 0 | 0 | 0 | 0 | 0 | 0 | 20 | 10 | 10 | 10 | 0 | 0 | 30 | 30 | 0 | 10 | 10 | 0 | 0 | 10 | 0 |
| 10 | 0 | 0 | 0 | 0 | 0 | 0 | 0 | 0 | 0 | 0 | 0 | 0 | 0 | 0 | 0 | 0 | 0 | 0 | 0 | 0 | 0 | 0 | 0 | 0 | 0 | 0 |
| 0 | 0 | 0 | 20 | 10 | 0 | 0 | 0 | 0 | 0 | 0 | 0 | 0 | 0 | 0 | 0 | 0 | 0 | 0 | 0 | 0 | 10 | 0 | 0 | 0 | 0 | 0 |
| 0 | 0 | 0 | 0 | 0 | 0 | 100 | 100 | 100 | 100 | 100 | 100 | 70 | 70 | 70 | 0 | 0 | 0 | 0 | 0 | 0 | 0 | 0 | 0 | 70 | 70 | 70 |

Supplemental table 1.2. Visual Lifestyle Activities section of Visual Function Questionnaire (VFQ) test. Results are expressed in %.

| **SPECTACLE USE** | **Distance** | | | **Intermediate** | | | **Near** | | |
| --- | --- | --- | --- | --- | --- | --- | --- | --- | --- |
| **How often do you use glasses or contact lenses?** | **PRE-OP** | **1 MONTH POST-OP** | **3 MONTH POST-OP** | **PRE-OP** | **1 MONTH POST-OP** | **3 MONTH POST-OP** | **PRE-OP** | **1 MONTH POST-OP** | **3 MONTH POST-OP** |
| **Always** | 10 | 0 | 0 | 0 | 0 | 0 | 10 | 0 | 0 |
| **Almost always** | 40 | 10 | 0 | 60 | 40 | 20 | 60 | 70 | 40 |
| **Time to time** | 10 | 80 | 30 | 20 | 50 | 60 | 20 | 20 | 40 |
| **Very Rare** | 20 | 0 | 30 | 10 | 0 | 0 | 10 | 0 | 0 |
| **Never** | 20 | 10 | 40 | 10 | 10 | 20 | 0 | 10 | 20 |

Supplemental table 1.3. Spectacle Use section of Visual Function Questionnaire (VFQ) test. Results are expressed in %.

| **OVERALL SATISFACTION How much satisfied are you with your vision on a scale from 1 to 10?** | **PRE-OP** | **1 MONTH POST-OP** | **3 MONTH POST-OP** |
| --- | --- | --- | --- |
| **1, At Least** | 0 | 0 | 0 |
| **2** | 0 | 0 | 0 |
| **3** | 0 | 0 | 0 |
| **4** | 40 | 0 | 0 |
| **5** | 20 | 60 | 0 |
| **6** | 30 | 0 | 0 |
| **7** | 0 | 20 | 20 |
| **8** | 0 | 20 | 70 |
| **9** | 0 | 0 | 10 |
| **10, Maximum Satisfaction** | 0 | 0 | 0 |

Supplemental table 1.4. Overall Satisfaction section of Visual Function Questionnaire (VFQ) test. Results are expressed in %.
